# Supplementary material for: A Comprehensive Pan-Cancer Analysis for Pituitary Tumor-Transforming Gene 1
Source: Front Genet. 2022 Feb 25;13:843579. doi: 10.3389/fgene.2022.843579 (PMC8916819; doi:10.3389/fgene.2022.843579)
Supplement: Supplementary file 1 [file Table2.xlsx]

## Sheet: Sheet 1
Supplementary Table S2. The number of patients from TCGA database.
Tumor type	group	number of samples
ACC	Tumor	77
BLCA	Normal	19
BLCA	Tumor	407
BRCA	Normal	113
BRCA	Tumor	1099
CESC	Normal	3
CESC	Tumor	306
CHOL	Normal	9
CHOL	Tumor	36
COAD	Normal	41
COAD	Tumor	290
DLBC	Tumor	47
ESCA	Normal	13
ESCA	Tumor	182
GBM	Normal	5
GBM	Tumor	166
HNSC	Normal	44
HNSC	Tumor	520
KICH	Normal	25
KICH	Tumor	66
KIRC	Normal	72
KIRC	Tumor	531
KIRP	Normal	32
KIRP	Tumor	289
LAML	Tumor	173
LGG	Tumor	523
LIHC	Normal	50
LIHC	Tumor	371
LUAD	Normal	59
LUAD	Tumor	515
LUSC	Normal	50
LUSC	Tumor	498
MESO	Tumor	87
OV	Tumor	427
PAAD	Normal	4
PAAD	Tumor	179
PCPG	Normal	3
PCPG	Tumor	182
PRAD	Normal	52
PRAD	Tumor	496
READ	Normal	10
READ	Tumor	93
SARC	Normal	2
SARC	Tumor	262
SKCM	Normal	1
SKCM	Tumor	469
STAD	Normal	36
STAD	Tumor	414
TGCT	Tumor	154
THCA	Normal	59
THCA	Tumor	512
THYM	Normal	2
THYM	Tumor	119
UCEC	Normal	23
UCEC	Tumor	181
UCS	Tumor	57
UVM	Tumor	79
