# Supplementary material for: A Comprehensive Pan-Cancer Analysis for Pituitary Tumor-Transforming Gene 1
Source: Front Genet. 2022 Feb 25;13:843579. doi: 10.3389/fgene.2022.843579 (PMC8916819; doi:10.3389/fgene.2022.843579)
Supplement: Supplementary file 2 [file Table3.xlsx]

## Sheet: Sheet1
Supplementary Table S3. PTTG1 related genes
Correlated genes		Interacted genes
CDC20		ANAPC11
CCNB1		ANAPC2
AURKB		AURKA
KIF2C		BTRC
KIFC1		BUB1B
CDC25C		CAMK2A
CDKN3		CDC20
CENPM		CDC27
CCNB2		CDC34
TROAP		CDK1
RAD54L		CRK
RNASEH2A		CUL1
BIRC5		DECR1
CDC45		DNAJA1
KIF20A		ESPL1
UBE2S		FZR1
FEN1		HNRNPAB
PKMYT1		MAPK1
CDCA5		MAPK3
UBE2C		NUP98
CKS2		PARK2
H2AFZ		PIK3CA
NCAPG		PIK3CG
POC1A		PIK3R1
MND1		PLCG2
ASF1B		PPP2R2D
PRC1		PPP2R5A
UBE2T		PTTG1
CDCA3		PTTG1IP
CDK1		RAD23A
SPC24		RAE1
PCNA		RPS10
NCAPH		SMURF1
LRR1		TP53
NUDT1		UBE2C
POLD1		UBE2N
CENPH		UBE4A
TPX2		USP44
TK1		XRCC6
PLK1
VRK1
NDC80
CENPA
CCNA2
SKA1
POLA2
NUSAP1
RFC4
SPC25
KIF4A
KIAA0101
DTYMK
TRAIP
LIG1
CKS1B
ZWINT
DLGAP5
C16orf59
EXO1
GINS2
SNRPD1
SPAG5
ASPM
CTB-193M12.5
GTSE1
NUF2
ALYREF
MAGOH
OIP5
E2F1
H2AFV
CDCA4
HJURP
KIF23
SNRPB
KIF15
KPNA2
UBE2SP2
EZH2
CEP55
KIF11
MELK
CHAF1A
MCM2
HMGN2
HMMR
PHF19
PPIH
MAD2L1
FANCG
RFC2
CENPF
HMGB2
PLK4
SNRPC
CDT1
MXD3
BCL2L12
CENPU
LMNB1
