# Supplementary material for: A Comprehensive Pan-Cancer Analysis for Pituitary Tumor-Transforming Gene 1
Source: Front Genet. 2022 Feb 25;13:843579. doi: 10.3389/fgene.2022.843579 (PMC8916819; doi:10.3389/fgene.2022.843579)
Supplement: Supplementary file 3 [file Table4.xlsx]

## Sheet: Sheet1
Supplementary Table S4. The correlation of PTTG1 and related StromalScore, ImmuneScore and ESTIMATEScore in different types of tumors.
Immu	StromalScore	StromalScore	StromalScore	StromalScore	ImmuneScore	ImmuneScore	ImmuneScore	ImmuneScore	ESTIMATEScore	ESTIMATEScore	ESTIMATEScore	ESTIMATEScore
Method	pearson_R	pearson_P	spearman_P	spearman_R	pearson_R	pearson_P	spearman_P	spearman_R	pearson_R	pearson_P	spearman_P	spearman_R
TCGA-GBM(N=152)	-0.318439	6.38372e-05	-0.30317	0.000146681	-0.313124	8.57201e-05	-0.321647	5.3292e-05	-0.327453	3.82348e-05	-0.31378	8.26798e-05
TCGA-GBMLGG(N=656)	0.379392	6.92113e-24	0.396154	4.45336e-26	0.318475	6.2697e-17	0.333161	1.81009e-18	0.352147	1.38141e-20	0.365416	3.73727e-22
TCGA-LGG(N=504)	0.165623	0.000187842	0.16661	0.000171699	0.138182	0.00187461	0.138975	0.00176346	0.152953	0.000569883	0.150739	0.000686028
TCGA-UCEC(N=178)	-0.252512	0.000672708	-0.144755	0.0538765	-0.0987187	0.189859	-0.0590481	0.433666	-0.173819	0.02032	-0.0947317	0.208462
TARGET-LAML(N=142)	-0.00857578	0.91932	0.0252122	0.765833	-0.0667317	0.430082	-0.0401936	0.634843	-0.0451762	0.593445	-0.0236971	0.779534
TCGA-BRCA(N=1077)	-0.283767	2.14629e-21	-0.307942	4.33329e-25	0.0705272	0.0206275	0.0634399	0.0373765	-0.0983095	0.0012363	-0.111052	0.000260686
TCGA-CESC(N=291)	-0.134494	0.0217412	-0.0968123	0.0992994	-0.00514417	0.930373	0.0211572	0.719295	-0.0671153	0.253761	-0.0362403	0.538057
TCGA-LUAD(N=500)	-0.158707	0.000367299	-0.180274	5.03037e-05	-0.0519088	0.246623	-0.0561468	0.210086	-0.108796	0.0149378	-0.120545	0.00696394
TCGA-ESCA(N=181)	-0.167714	0.0240244	-0.0855969	0.251913	-0.229217	0.00191009	-0.151944	0.0411611	-0.215966	0.00350105	-0.121294	0.103833
TCGA-STES(N=569)	-0.391564	2.7299e-22	-0.357018	1.51206e-18	-0.252767	9.60907e-10	-0.247335	2.23061e-09	-0.346862	1.57193e-17	-0.329235	7.5015e-16
TCGA-SARC(N=258)	-0.201799	0.00111715	-0.253304	3.85106e-05	-0.005868	0.92527	-0.043355	0.488103	-0.0883287	0.157172	-0.135911	0.0290658
TCGA-KIRP(N=285)	0.141803	0.0165977	0.14101	0.0172197	0.133452	0.0242522	0.112565	0.0576959	0.144559	0.0145836	0.136296	0.0213589
TCGA-KIPAN(N=878)	0.34526	5.54751e-26	0.371662	3.80393e-30	0.403964	8.57001e-36	0.428826	1.38582e-40	0.397354	1.38117e-34	0.435106	7.35382e-42
TCGA-COAD(N=282)	-0.3264	2.00857e-08	-0.32159	3.31643e-08	-0.142226	0.0168511	-0.128266	0.0312962	-0.253665	1.62099e-05	-0.239655	4.78222e-05
TCGA-COADREAD(N=373)	-0.331468	5.14124e-11	-0.30872	1.11643e-09	-0.171159	0.000903219	-0.142003	0.00600933	-0.271954	9.52497e-08	-0.238046	3.33534e-06
TCGA-PRAD(N=495)	0.0802135	0.0745863	0.0990622	0.0275353	0.206319	3.68138e-06	0.179783	5.75497e-05	0.163282	0.000264158	0.162579	0.000281014
TCGA-STAD(N=388)	-0.415568	1.24102e-17	-0.406381	7.32563e-17	-0.182791	0.000295194	-0.187492	0.000203819	-0.325132	5.2788e-11	-0.330235	2.52385e-11
TCGA-HNSC(N=517)	-0.272202	3.10451e-10	-0.229963	1.24212e-07	0.111178	0.0114172	0.132976	0.00244785	-0.0787321	0.0736749	-0.0344901	0.433886
TCGA-KIRC(N=528)	0.170451	8.27726e-05	0.164921	0.000140832	0.40397	3.81441e-22	0.410222	7.55062e-23	0.34159	6.76517e-16	0.357752	2.18705e-17
TCGA-LUSC(N=491)	-0.383591	1.16842e-18	-0.388525	3.86197e-19	-0.290236	5.50978e-11	-0.27714	4.15326e-10	-0.353925	6.18401e-16	-0.346936	2.46953e-15
TCGA-THYM(N=118)	-0.353928	8.43266e-05	-0.351185	9.65199e-05	0.413613	3.23394e-06	0.300348	0.000951377	0.12365	0.182201	0.01375	0.882517
TCGA-LIHC(N=363)	-0.256061	7.63516e-07	-0.261247	4.46006e-07	0.0998761	0.0572905	0.0644035	0.220918	-0.056187	0.285675	-0.0771783	0.142223
TARGET-WT(N=80)	-0.140388	0.21421	-0.0977731	0.388239	-0.0639877	0.572826	-0.0447257	0.693625	-0.115099	0.309317	-0.0812471	0.473717
TCGA-SKCM-P(N=101)	-0.38368	7.47503e-05	-0.398754	3.62437e-05	-0.116481	0.246049	-0.146791	0.142971	-0.233488	0.0187788	-0.248585	0.0121889
TCGA-SKCM(N=452)	-0.192167	3.91231e-05	-0.192537	3.77772e-05	-0.0757002	0.107997	-0.0594266	0.207293	-0.127431	0.00667181	-0.11433	0.0150184
TCGA-BLCA(N=405)	-0.0377005	0.44927	-0.0153548	0.758026	0.108031	0.0297258	0.125376	0.0115596	0.0379023	0.446846	0.058749	0.238133
TCGA-SKCM-M(N=351)	-0.149355	0.00504835	-0.142403	0.00753948	-0.0534858	0.317699	-0.0300622	0.574571	-0.0956887	0.0733829	-0.0767173	0.151491
TCGA-THCA(N=503)	0.077264	0.0834291	0.064347	0.149569	0.0330249	0.459888	0.0110249	0.805176	0.0535042	0.230977	0.0396234	0.375188
TARGET-NB(N=153)	-0.35594	6.31967e-06	-0.398466	3.37498e-07	-0.197302	0.0145031	-0.235488	0.0033867	-0.287453	0.000314834	-0.334717	2.34832e-05
TCGA-MESO(N=85)	0.068727	0.531978	0.134366	0.22019	0.0951762	0.386239	0.0774286	0.481218	0.0978836	0.37281	0.0956424	0.383906
TCGA-READ(N=91)	-0.348823	0.00070236	-0.270648	0.00946605	-0.280622	0.00705321	-0.169263	0.108728	-0.336462	0.00111062	-0.248304	0.0176338
TCGA-OV(N=417)	-0.207116	2.01659e-05	-0.156165	0.00137883	-0.0702459	0.152165	-0.0733188	0.134985	-0.144849	0.00302998	-0.129454	0.00812731
TCGA-UVM(N=79)	0.0904941	0.427698	0.13901	0.221784	0.164961	0.146278	0.191883	0.0902483	0.149104	0.189694	0.18032	0.111781
TCGA-PAAD(N=177)	-0.110415	0.143456	-0.256286	0.000574888	-0.0446681	0.554953	-0.196376	0.00880167	-0.0811466	0.282954	-0.232983	0.001804
TCGA-TGCT(N=132)	-0.278983	0.00119801	-0.224922	0.00951716	-0.264966	0.00213807	-0.300397	0.000465842	-0.330215	0.000110253	-0.342119	5.94185e-05
TCGA-UCS(N=56)	-0.356373	0.00702125	-0.396446	0.00248782	-0.109238	0.422884	-0.0880383	0.518789	-0.252887	0.0600473	-0.232468	0.0846901
TCGA-LAML(N=214)	0.109679	0.109621	0.148245	0.0301637	-0.117878	0.0853775	-0.0945411	0.168202	-0.019702	0.774453	0.019411	0.777697
TARGET-ALL(N=86)	-0.287407	0.00729302	-0.243154	0.0240773	-0.0322674	0.768045	0.00909481	0.933765	-0.131251	0.228365	-0.0832024	0.446288
TCGA-PCPG(N=177)	0.0157027	0.835663	-0.0322796	0.669728	-0.0140098	0.853169	-0.0750811	0.320605	0.0011394	0.987991	-0.0505792	0.503768
TCGA-ACC(N=77)	-0.181588	0.113984	-0.269599	0.0177348	-0.200592	0.0802529	-0.286161	0.0116364	-0.200837	0.0798756	-0.270282	0.0174373
TARGET-ALL-R(N=99)	-0.188378	0.0618619	-0.0813484	0.423447	-0.246879	0.0137595	-0.166296	0.0999517	-0.245165	0.0144519	-0.155084	0.125335
TCGA-DLBC(N=46)	-0.0276298	0.855369	-0.075488	0.618056	-0.491917	0.000516375	-0.542046	9.98977e-05	-0.321054	0.0295912	-0.416787	0.00395934
TCGA-KICH(N=65)	0.0271587	0.829961	-0.185845	0.138285	-0.0444746	0.725001	-0.174547	0.164335	-0.0137943	0.913155	-0.186304	0.137297
TCGA-CHOL(N=36)	-0.134382	0.434574	-0.198713	0.245304	0.0917724	0.594499	-0.0200772	0.907475	0.00700636	0.967651	-0.0795367	0.64472
